# Supplementary material for: The influence of sublethal neonicotinoid doses on individual Apis mellifera scutellata thermotolerance
Source: Springer Nature journal article supplement (doi:10.1007/s13592-023-00989-y), 2023-01-18
Supplement: MOESM1 [file 13592_2023_989_MOESM1_ESM.pdf]

1 **The influence of sublethal neonicotinoid doses on individual *Apis mellifera scutellata***  
2 **thermotolerance**

3 Laura Catherine Bester\* (ORCID 0000-0001-6628-3902)<sup>1</sup>

4 Mia Wege (ORCID 0000-0002-9022-3069)<sup>2</sup>

5 Christian Walter Werner Pirk (ORCID 0000-0001-6821-7044)<sup>1</sup>

6 <sup>1</sup>Social Insects Research Group, Department of Zoology and Entomology, University of Pretoria,  
7 Private Bag X20, Hatfield, 0028, Pretoria, South Africa

8 <sup>2</sup>Department of Zoology and Entomology, University of Pretoria, Private Bag X20, Hatfield,  
9 0028, Pretoria, South Africa

10 \*lauracatherinebester@gmail.com

11 **Supplementary Material**

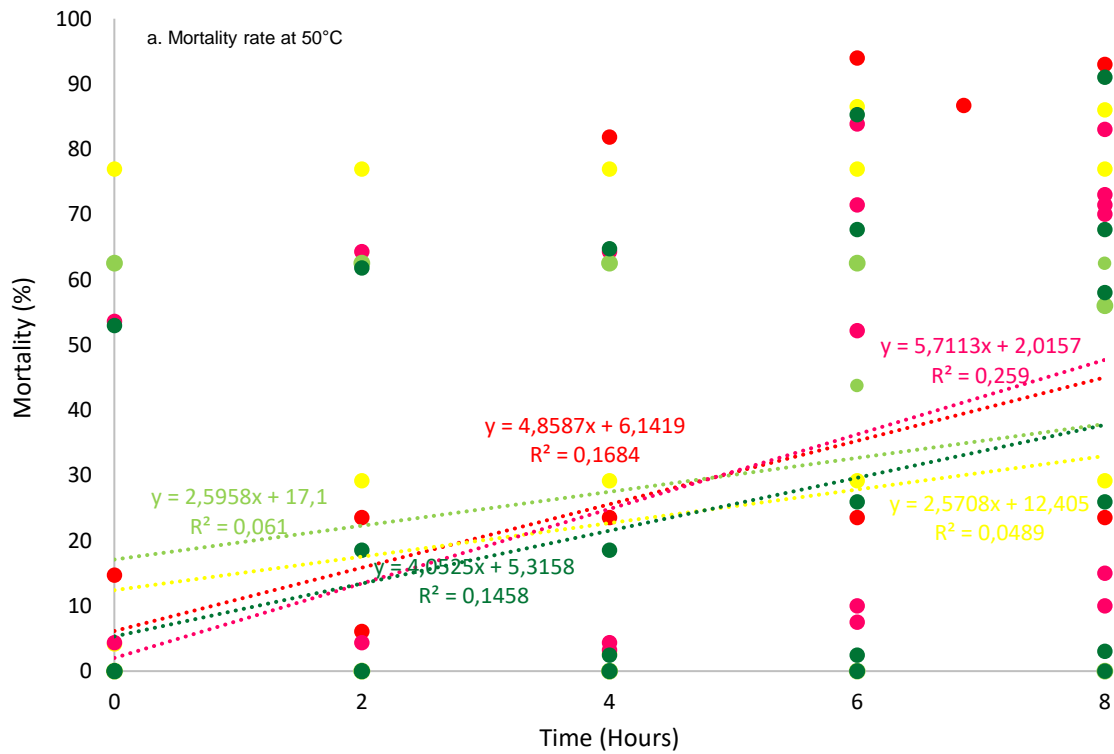

13 **Figure S7** Individual mortalities are indicated for the three treatments; Clothianidin (CLO),  
 14 Thiamethoxam (THX), Imidacloprid (IMI), and the two controls; Acetone (ACE) and Sucrose  
 15 (SUC). Mortalities were measured at 2-hour intervals during the 8-hour period. Mortality rates  
 16 (indicated as the colour corresponding broken lines) for the lowest temperature ramp ending at  
 17 50°C.

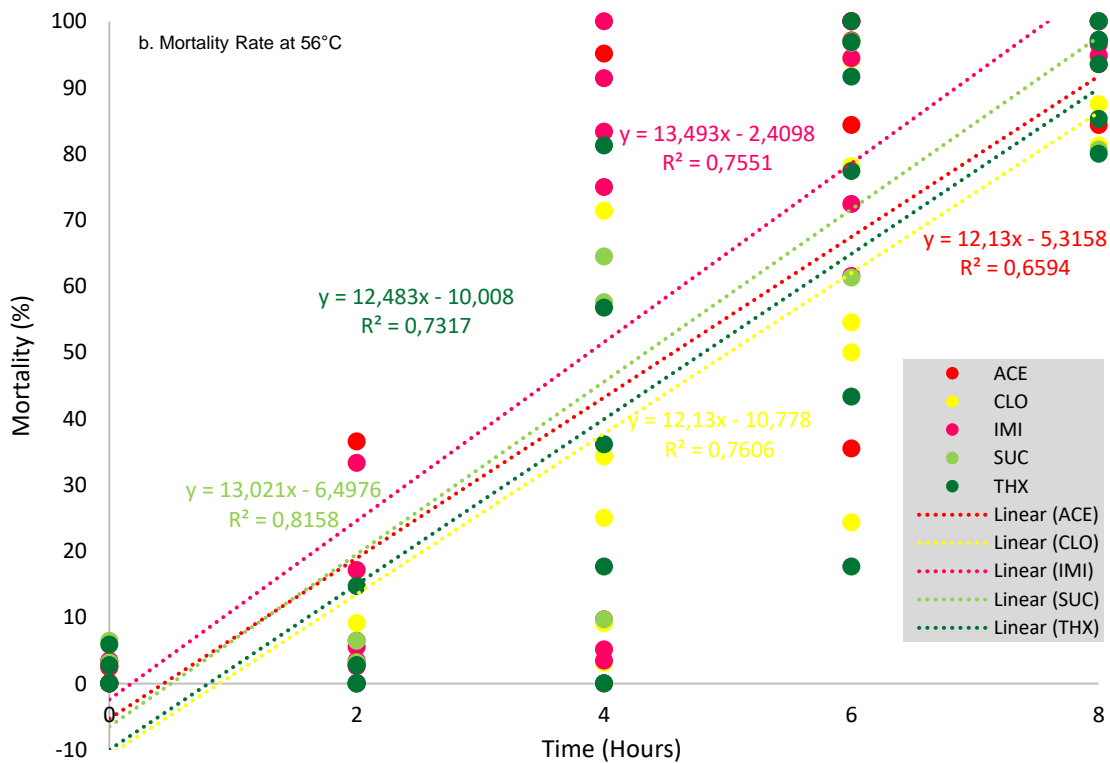

18  
 19 **Figure S8** Individual mortalities are indicated for the three treatments; Clothianidin (CLO),  
 20 Thiamethoxam (THX), Imidacloprid (IMI), and the two controls; Acetone (ACE) and Sucrose  
 21 (SUC). Mortalities were measured at 2-hour intervals during the 8-hour period. Mortality rates  
 22 (indicated as the colour corresponding broken lines) for the highest temperature ramp ending at  
 23 56°C.

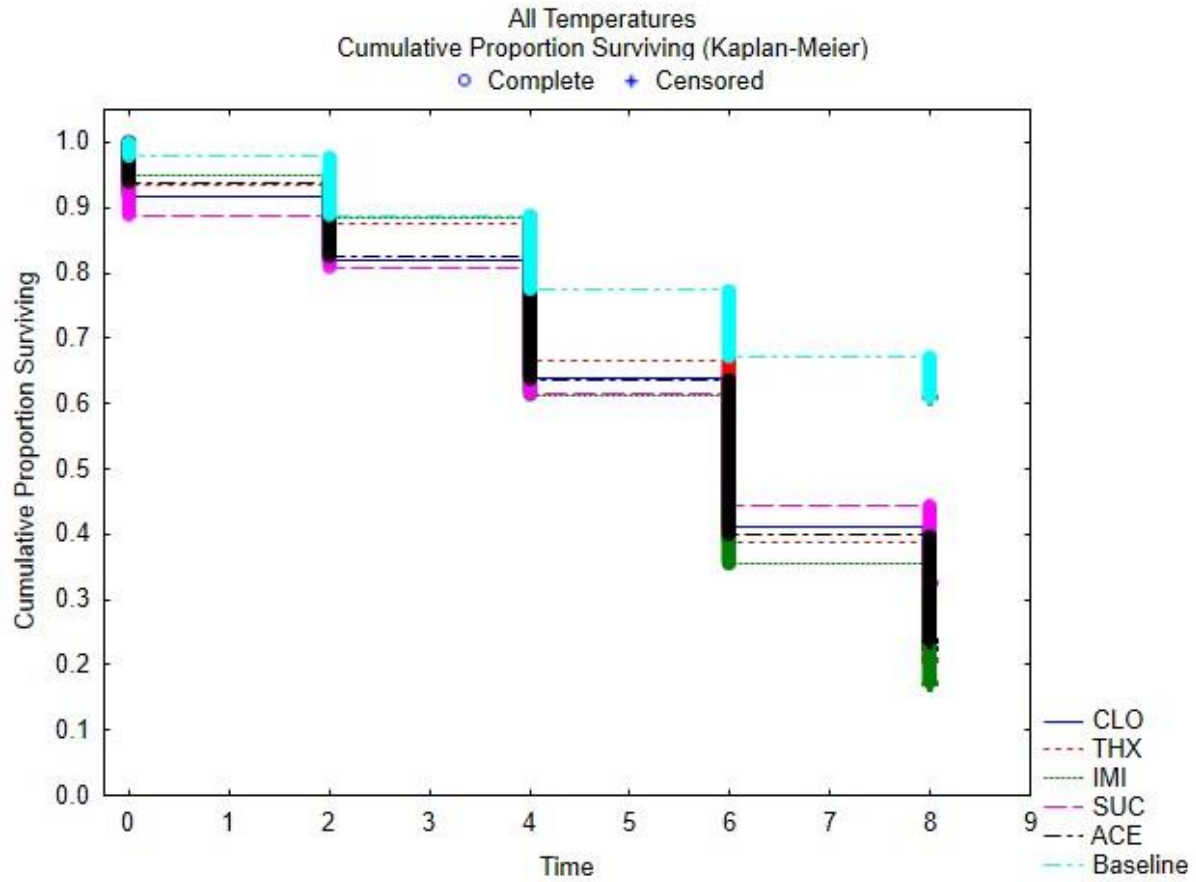

24

25 **Figure S9** Survival analysis graph showing the cumulative proportion of surviving honey bees  
 26 across the 8 hours after temperature ramp treatment, combined data for all temperatures per  
 27 treatment. Survival rates for honey bees treated with clothianidin (CLO), imidacloprid (IMI) and  
 28 thiamethoxam (THX), the sucrose (SUC) and acetone (ACE) controls as well as the Baseline  
 29 experiment are shown. Survival was recorded at 2-hour intervals.

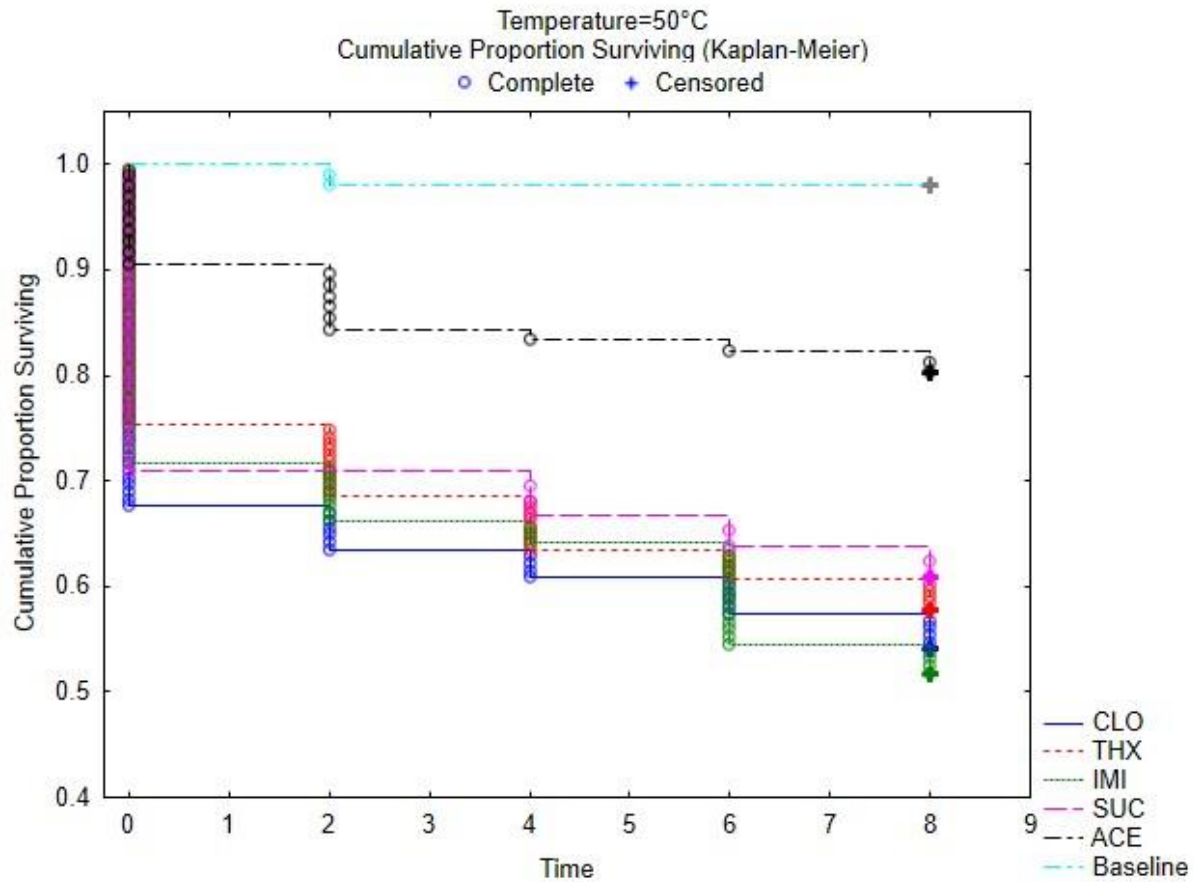

30

31 **Figure S10** Survival analysis graph showing the cumulative proportion of surviving honey bees  
 32 across the 8 hours after temperature ramp treatment terminating at 50°C. Survival rates for honey  
 33 bees treated with clothianidin (CLO), imidacloprid (IMI) and thiamethoxam (THX), the sucrose  
 34 (SUC) and acetone (ACE) controls as well as the Baseline experiment are shown. Survival was  
 35 recorded at 2-hour intervals.

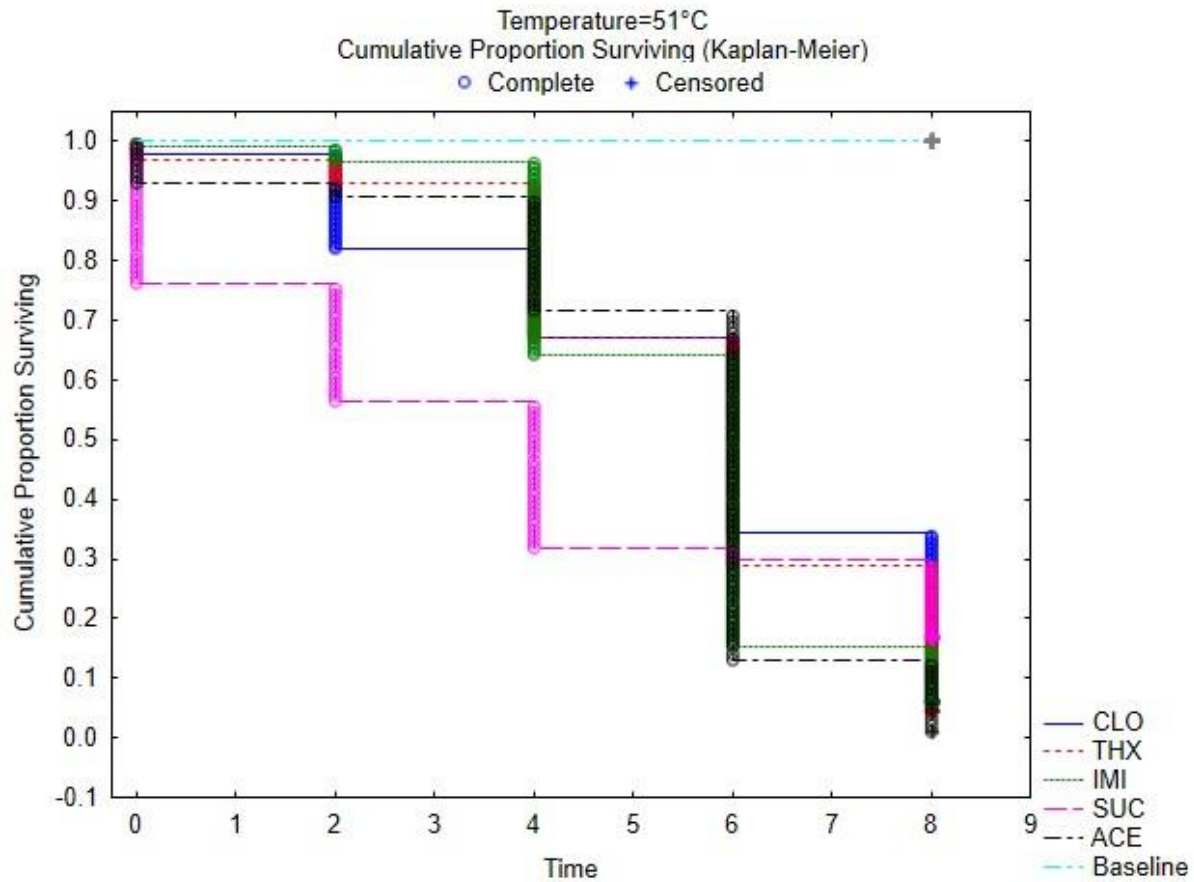

36

37 **Figure S11** Survival analysis graph showing the cumulative proportion of surviving honey bees  
 38 across the 8 hours after temperature ramp treatment terminating at 51°C. Survival rates for honey  
 39 bees treated with clothianidin (CLO), imidacloprid (IMI) and thiamethoxam (THX), the sucrose  
 40 (SUC) and acetone (ACE) controls as well as the Baseline experiment are shown. Survival was  
 41 recorded at 2-hour intervals.

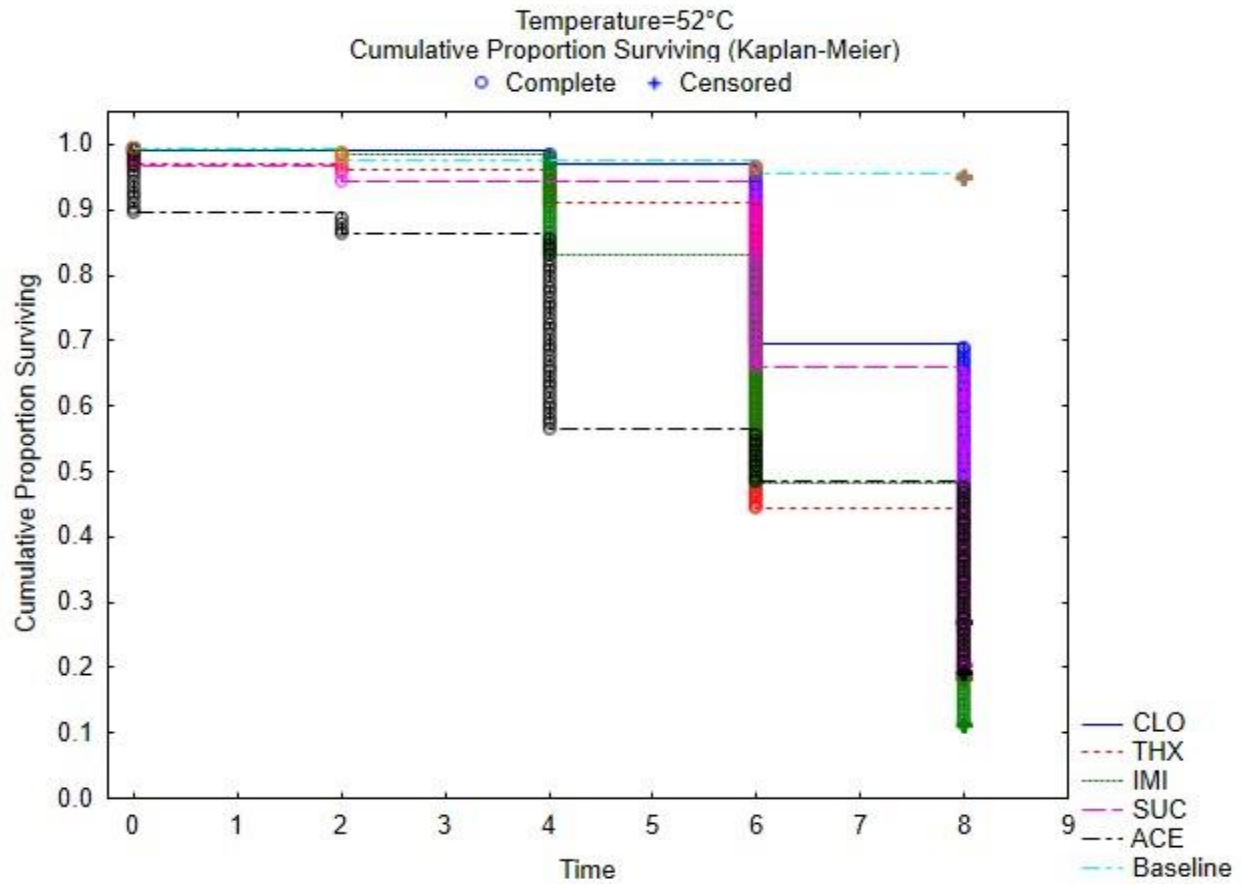

42

43 **Figure S12** Survival analysis graph showing the cumulative proportion of surviving honey bees  
 44 across the 8 hours after temperature ramp treatment terminating at 52°C. Survival rates for honey  
 45 bees treated with clothianidin (CLO), imidacloprid (IMI) and thiamethoxam (THX), the sucrose  
 46 (SUC) and acetone (ACE) controls as well as the Baseline experiment are shown. Survival was  
 47 recorded at 2-hour intervals.

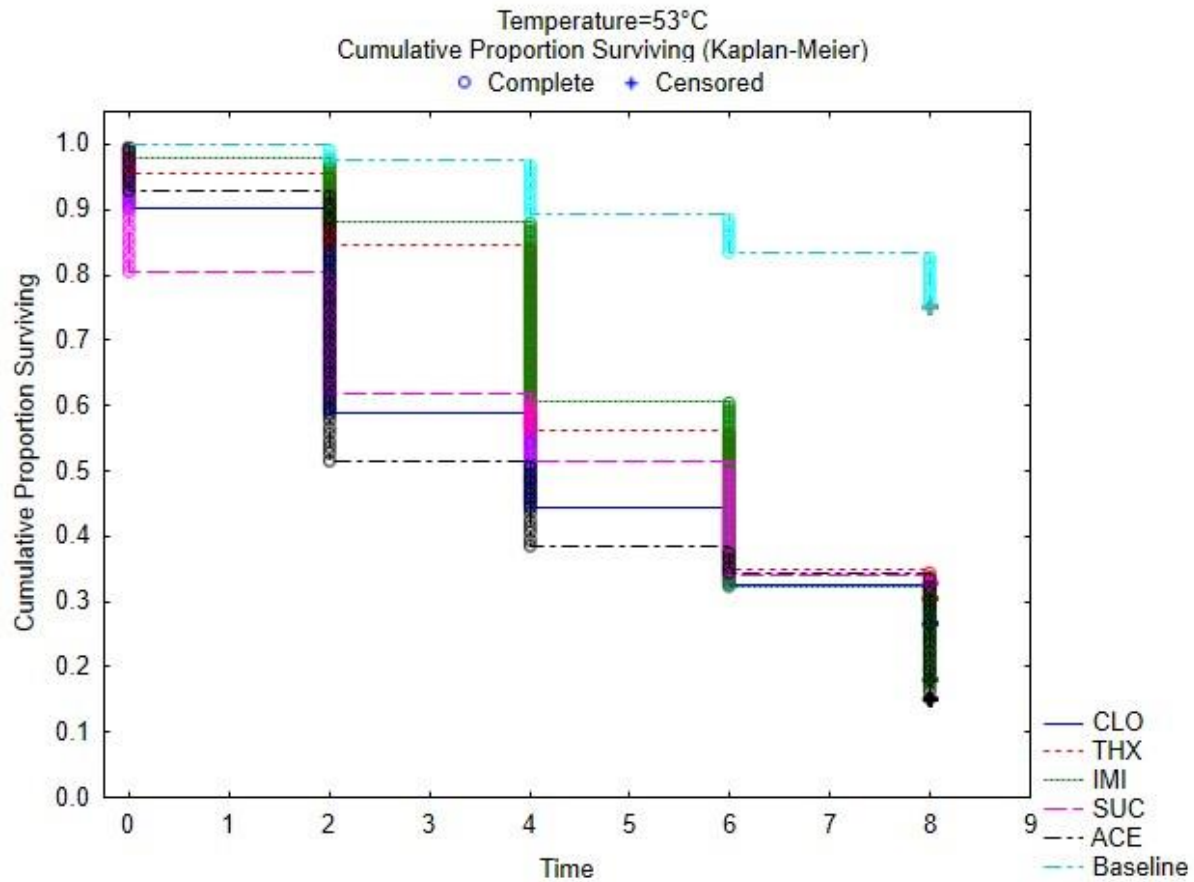

48

49 **Figure S13** Survival analysis graph showing the cumulative proportion of surviving honey bees  
 50 across the 8 hours after temperature ramp treatment terminating at 53°C. Survival rates for honey  
 51 bees treated with clothianidin (CLO), imidacloprid (IMI) and thiamethoxam (THX), the sucrose  
 52 (SUC) and acetone (ACE) controls as well as the Baseline experiment are shown. Survival was  
 53 recorded at 2-hour intervals.

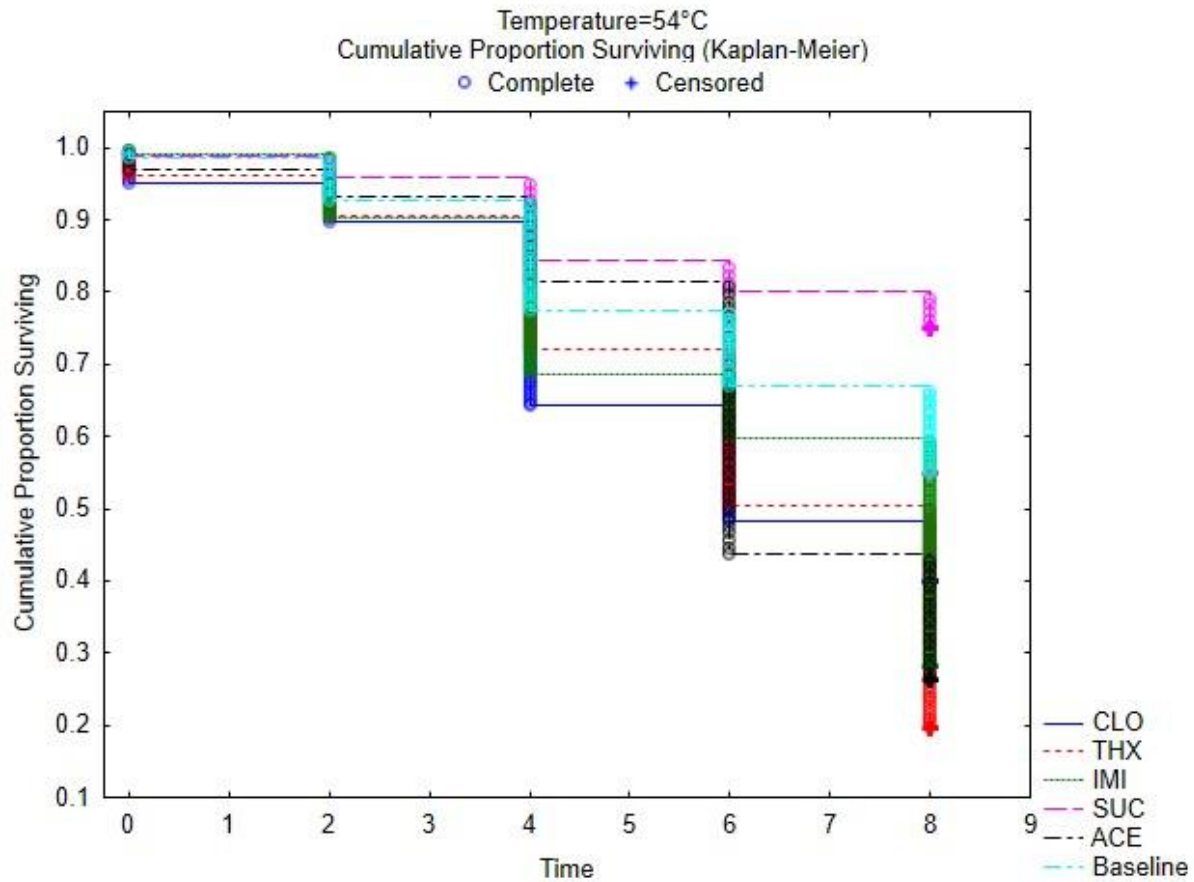

54

55 **Figure S14** Survival analysis graph showing the cumulative proportion of surviving honey bees  
 56 across the 8 hours after temperature ramp treatment terminating at 54°C. Survival rates for honey  
 57 bees treated with clothianidin (CLO), imidacloprid (IMI) and thiamethoxam (THX), the sucrose  
 58 (SUC) and acetone (ACE) controls as well as the Baseline experiment are shown. Survival was  
 59 recorded at 2-hour intervals.



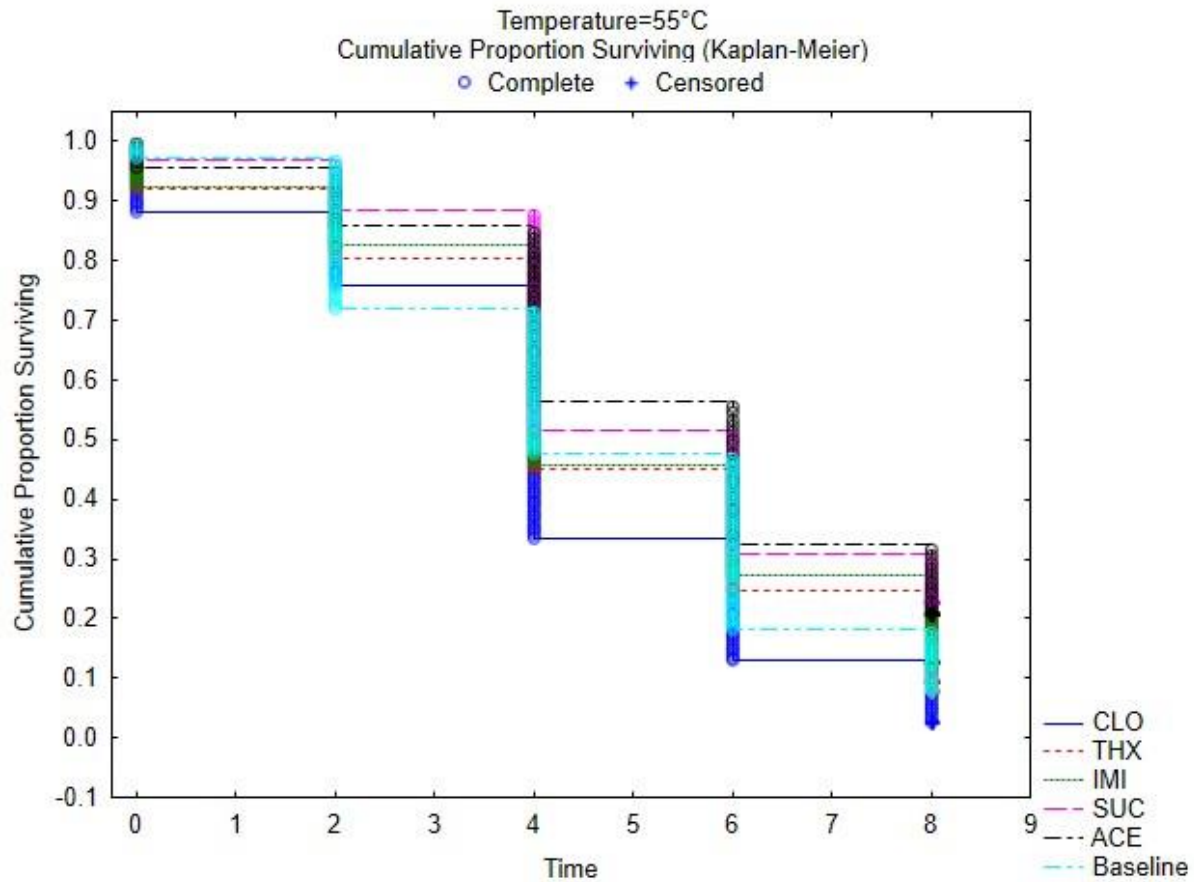

60

61 **Figure S15** Survival analysis graph showing the cumulative proportion of surviving honey bees  
 62 across the 8 hours after temperature ramp treatment terminating at 55°C. Survival rates for honey  
 63 bees treated with clothianidin (CLO), imidacloprid (IMI) and thiamethoxam (THX), the sucrose  
 64 (SUC) and acetone (ACE) controls as well as the Baseline experiment are shown. Survival was  
 65 recorded at 2-hour intervals.

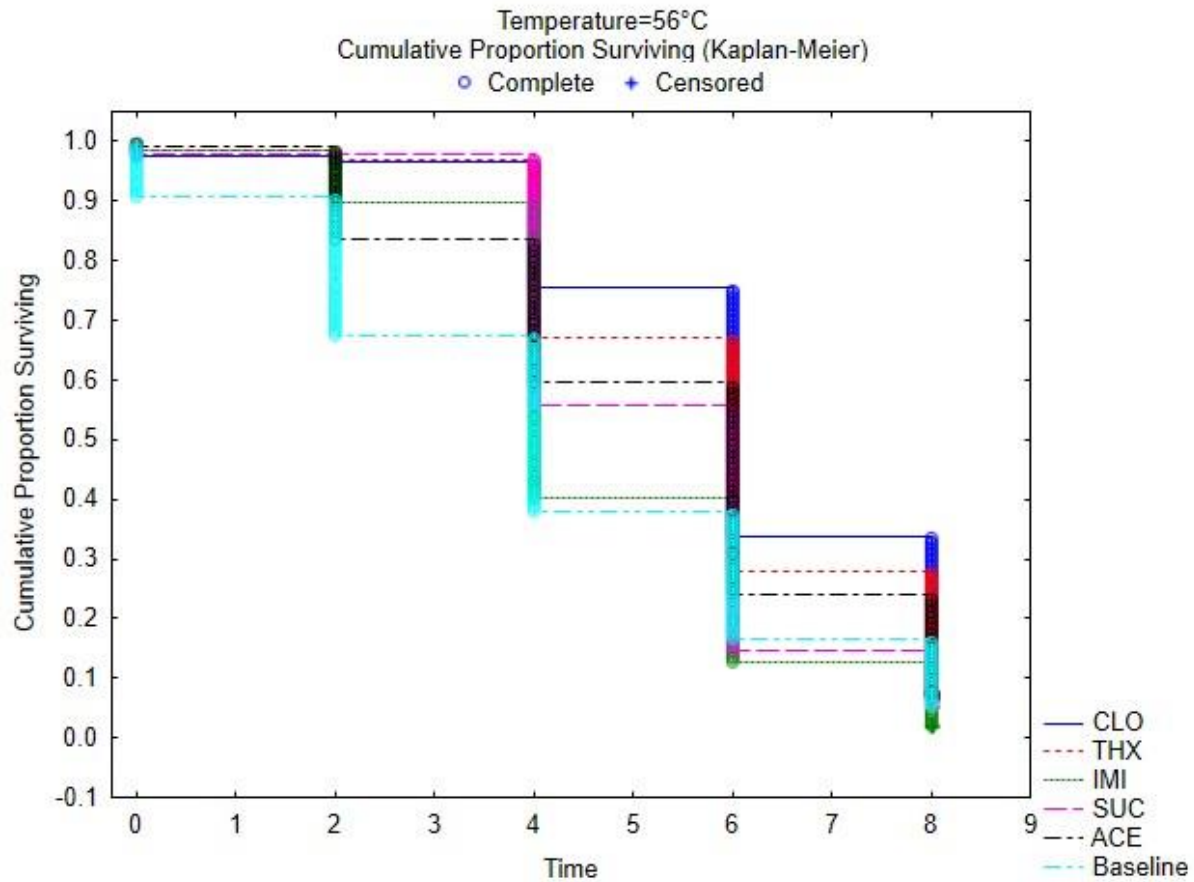

66

67 **Figure S16** Survival analysis graph showing the cumulative proportion of surviving honey bees  
 68 across the 8 hours after temperature ramp treatment terminating at 56°C. Survival rates for honey  
 69 bees treated with clothianidin (CLO), imidacloprid (IMI) and thiamethoxam (THX), the sucrose  
 70 (SUC) and acetone (ACE) controls as well as the Baseline experiment are shown. Survival was  
 71 recorded at 2-hour intervals.

72

73

74

75

76

77 **Table SI** Survival analysis statistics to compare Baseline, the three treatments clothianidin (CLO),  
78 imidacloprid (IMI), thiamethoxam (THX), and two controls acetone (ACE), and sucrose (SUC),  
79 at each of the seven target temperatures (Temp). Pairwise comparisons were done using the  
80 Gehan’s Wilcoxon Test, comparing whether treatment or temperature influences survival. Test  
81 statistic values are indicated in the top right section, and the corresponding *p*-value indicated in  
82 the bottom left section.

| Survival Analysis Statistics |      |                |                 |           |           |           |           |
|------------------------------|------|----------------|-----------------|-----------|-----------|-----------|-----------|
|                              | Temp | Baseline       | CLO             | IMI       | THX       | ACE       | SUC       |
| Baseline                     | 50   |                | 7,719312        | 7,932453  | 7,316304  | 6,493596  | 6,493596  |
|                              | 51   |                | 15,84279        | 16,14244  | 16,09351  | 13,21705  | 13,21705  |
|                              | 52   |                | 11,96384        | 14,34456  | 13,42483  | 11,43902  | 11,43902  |
|                              | 53   |                | 9,144892        | 9,404021  | 8,071751  | 7,268095  | 7,268095  |
|                              | 54   |                | 3,158653        | 3,821306  | 4,888532  | -2,88561  | -2,88561  |
|                              | 55   |                | <b>1,769400</b> | -1,19085  | -0,698314 | -2,44702  | -2,44702  |
|                              | 56   |                | -7,06426        | -2,30667  | -6,11184  | -3,68849  | -3,68849  |
| CLO                          | 50   | 0,00000        |                 | -0,058890 | -0,994403 | -4,33314  | -0,860575 |
|                              | 51   | 0,00000        |                 | 1,558709  | 0,1251735 | 1,578066  | 4,037261  |
|                              | 52   | 0,00000        |                 | 5,520609  | 4,685847  | 5,076887  | 1,138344  |
|                              | 53   | 0,00000        |                 | -3,15863  | -3,25059  | 1,055079  | -0,206061 |
|                              | 54   | 0,00159        |                 | 0,1173092 | 1,040331  | -0,088139 | -5,32647  |
|                              | 55   | <b>0,07683</b> |                 | -3,09031  | -2,59164  | -4,20105  | -4,07356  |
|                              | 56   | 0,00000        |                 | 7,259766  | 1,666344  | 2,947474  | 3,732491  |
| IMI                          | 50   | 0,00000        | 0,95304         |           | -0,927808 | -4,42674  | -4,42674  |
|                              | 51   | 0,00000        | 0,11907         |           | -1,63405  | -0,305657 | -0,305657 |
|                              | 52   | 0,00000        | 0,00000         |           | -0,816047 | 1,813127  | 1,813127  |
|                              | 53   | 0,00000        | 0,00159         |           | -0,142018 | 3,872698  | 3,872698  |
|                              | 54   | 0,00013        | 0,90662         |           | 1,476613  | 0,4610994 | 0,4610994 |
|                              | 55   | 0,23371        | 0,00200         |           | 0,5259096 | -1,66538  | -1,66538  |
|                              | 56   | 0,02107        | 0,00000         |           | -5,73154  | -2,45575  | -2,45575  |
| THX                          | 50   | ,00000         | 0,32003         | 0,35351   |           | -3,73374  | -3,45596  |
|                              | 51   | 0,00000        | 0,90039         | 0,10225   |           | 1,316785  | 1,43582   |
|                              | 52   | 0,00000        | 0,00000         | 0,41447   |           | 2,446461  | 2,23435   |
|                              | 53   | 0,00000        | 0,00115         | 0,88707   |           | 3,985146  | 3,872698  |
|                              | 54   | 0,00000        | 0,29819         | 0,13978   |           | -0,629328 | -0,629328 |
|                              | 55   | 0,48498        | 0,00955         | 0,59895   |           | -2,09562  | -2,09562  |
|                              | 56   | 0,00000        | 0,09564         | 0,00000   |           | 1,771043  | 1,771043  |
| ACE                          | 50   | 0,00000        | 0,00001         | 0,00001   | 0,00019   |           | 2,901582  |
|                              | 51   | 0,00000        | 0,11455         | 0,75987   | 0,18791   |           | 3,271165  |
|                              | 52   | 0,00000        | 0,00000         | 0,06981   | 0,01443   |           | -3,20367  |

|     |    |         |         |         |         |         |           |
|-----|----|---------|---------|---------|---------|---------|-----------|
|     | 53 | 0,00000 | 0,29139 | 0,00011 | 0,00007 |         | -0,976003 |
|     | 54 | 0,00391 | 0,92977 | 0,64473 | 0,52913 |         | -5,69420  |
|     | 55 | 0,01440 | 0,00003 | 0,09584 | 0,03612 |         | 0,1612038 |
|     | 56 | 0,00023 | 0,00320 | 0,01406 | 0,07655 |         | 0,2381309 |
| SUC | 50 | 0,00000 | 0,38947 | 0,00001 | 0,00001 | 0,00371 |           |
|     | 51 | 0,00000 | 0,00005 | 0,75987 | 0,75987 | 0,00107 |           |
|     | 52 | 0,00000 | 0,25498 | 0,06981 | 0,07851 | 0,00136 |           |
|     | 53 | 0,00000 | 0,83674 | 0,00011 | 0,00011 | 0,32906 |           |
|     | 54 | 0,00391 | 0,00000 | 0,64473 | 0,68933 | 0,00000 |           |
|     | 55 | 0,01440 | 0,00005 | 0,09584 | 0,08734 | 0,87193 |           |
|     | 56 | 0,00023 | 0,00019 | 0,01406 | 0,02066 | 0,81178 |           |

83

84
